# Supplementary material for: Mono(NCN-pincer palladium)-metalloporphyrin catalysts: evidence for supramolecular bimetallic catalysis
Source: Royal Society of Chemistry journal article supplement (doi:10.1039/b925236n), 2010-01-01
Supplement: b925236n.pdf [file b925236n.pdf]

**Electronic supplementary information to:**

**Mono(NCN-Pincer Palladium)-Metalloporphyrin Catalysts:  
Evidence for Supramolecular Bimetallic Catalysis†**

Bart M. J. M. Suijkerbuijk,<sup>a</sup> Daniël J. Schamhart,<sup>a</sup> Huub Kooijman,<sup>b</sup> Anthony L. Spek,<sup>b</sup> Gerard van Koten<sup>a</sup> and Robertus J. M. Klein Gebbink\*<sup>a</sup>

<sup>a</sup>Faculty of Science, Chemical Biology & Organic Chemistry  
Utrecht University, Padualaan 8, 3584 CH Utrecht (The Netherlands)  
Phone: (+31)30-2531889; Fax: (+31)30-2523615  
E-mail: r.j.m.kleingebink@uu.nl

<sup>b</sup>Faculty of Science, Crystal and Structural Chemistry  
Utrecht University, Padualaan 8, 3584 CH Utrecht (The Netherlands)

### **[Meso-tetrakis(*p*-tolyl)porphyrinato]magnesium(II) (MgTTP)**

A solution of **TTP** (102 mg, 152  $\mu\text{mol}$ ) in dry  $\text{CH}_2\text{Cl}_2$  (60 mL) was treated with  $\text{Et}_3\text{N}$  (1 mL) and  $\text{MgBr}_2\cdot\text{OEt}_2$  (500 mg, 1.94 mmol) and the mixture was stirred overnight at ambient temperature. The resulting pink solution was washed with 5%  $\text{NaHCO}_3$  ( $3 \times 100$  mL) and loaded onto a column with alumina. Pure  $\text{CH}_2\text{Cl}_2$  eluted traces of **TTP** and acetone/ $\text{CH}_2\text{Cl}_2$  (1:9) was used to elute the product. The volatiles were evaporated and the resulting solid was stripped twice with toluene. The purple solid was then sonicated with hexanes (60 mL) for 30 min, and the mixture was cooled at  $-30$  °C overnight to give the **MgTTP** as purple crystals, which were isolated by centrifugation and dried *in vacuo*. Yield: 104 mg (98%).  $^1\text{H}$  NMR ( $\text{CDCl}_3/1\%$  pyridine- $d_5$ ):  $\delta$  = 8.88 (s, 8H,  $\beta\text{-H}$ ), 8.09 (d,  $^3J_{\text{HH}} = 8.0$  Hz, 8H, ArH), 7.51 (d,  $^3J_{\text{HH}} = 8.0$  Hz, 8H, ArH), 2.69 (s, 12H, ArCH<sub>3</sub>) ppm;  $^{13}\text{C}\{^1\text{H}\}$  NMR ( $\text{CDCl}_3/1\%$  pyridine- $d_5$ ):  $\delta$  = 150.1, 141.0, 136.6, 134.7, 131.8, 127.0, 121.6, 21.6 ppm; UV/Vis [ $\lambda_{\text{max}}$  (log  $\epsilon$ ),  $\text{CH}_2\text{Cl}_2$ ]: 426 (5.70), 565 (4.36), 605 (4.18) nm; LDI-TOF MS:  $m/z$  1404.67 ( $[\text{2M}+\text{H}_2\text{O}]^+$ ), calcd. for  $\text{C}_96\text{H}_{74}\text{Mg}_2\text{N}_8\text{O}$ : 1404.57; 708.88 ( $[\text{M}+\text{O}]^+$ ), calcd. for  $\text{C}_{48}\text{H}_{36}\text{MgN}_4\text{O}$ : 708.27; 691.83 ( $[\text{M}]^+$ ), calcd. for  $\text{C}_{48}\text{H}_{36}\text{MgN}_4$ : 692.28;

### **[Meso-tetrakis(*p*-tolyl)porphyrinato]nickel(II) (NiTTP)**

**TTP** (120 mg, 179  $\mu\text{mol}$ ) and  $\text{Ni}(\text{acac})_2$  (1.18 g, 4.59 mmol) were suspended in dry toluene and the mixture was heated to reflux for 4 h. All volatiles were subsequently evaporated *in vacuo* and the remaining orange solid was dissolved in  $\text{CH}_2\text{Cl}_2$  (70 mL) and washed with 5%  $\text{K}_2\text{CO}_3$  ( $4 \times 40$  mL). The organic layer was isolated, dried ( $\text{MgSO}_4$ ) and filtered over silicagel with  $\text{CH}_2\text{Cl}_2$ . The orange band was concentrated to 3 mL, MeOH (50 mL) was added and the orange mixture was concentrated to 20 mL. After 1 h, the orange crystals were isolated by centrifugation and dried *in vacuo*. Yield: 120 mg (92%). MALDI-TOF MS (NA):  $m/z$  726.12 ( $[\text{M}]^+$ ), calcd. for  $\text{C}_{48}\text{H}_{36}\text{N}_4\text{Ni}$ : 726.23; all other analysis data were identical to those reported in the literature.<sup>1</sup>

### **[Meso-tetrakis(*p*-tolyl)porphyrinato]zinc(II) (ZnTTP)**

**TTP** (60 mg, 90  $\mu\text{mol}$ ) was dissolved in dry  $\text{CH}_2\text{Cl}_2$  (60 mL), stirred at room temperature and shielded from ambient light with Al foil. Subsequently, a saturated solution of  $\text{Zn}(\text{OAc})_2\cdot 2\text{H}_2\text{O}$  in degassed MeOH (4 mL, excess) was added and

stirring was continued. After 2 h, H<sub>2</sub>O (40 mL), CH<sub>2</sub>Cl<sub>2</sub> (20 mL), and K<sub>2</sub>CO<sub>3</sub> (6 M, 2 mL) were added and the phases were separated. The organic layer was washed with brine (30 mL), dried (MgSO<sub>4</sub>), filtered and loaded onto a silicagel column and eluted with CH<sub>2</sub>Cl<sub>2</sub>. The pink band was evaporated *in vacuo* and the purple residue was redissolved in CH<sub>2</sub>Cl<sub>2</sub> (20 mL), hexanes (60 mL) were added and the solution was concentrated to 20 mL. The precipitated red crystals was collected by centrifugation and dried *in vacuo* to give the title compound. Yield: 63 mg (96%). LDI-TOF MS: *m/z* 731.61 ([M]<sup>+</sup>), calcd. for C<sub>48</sub>H<sub>36</sub>N<sub>4</sub>Zn: 732.23; all other analysis data were identical to those reported in literature.<sup>2</sup>

### References

1. T. Ozawa and A. Hanaki, *J. Chem. Soc., Dalton Trans.*, 1985, 1513–1516.
2. G. Lipiner, I. Willner and Z. Aizenshtat, *Nouv. J. Chim.*, 1986, **10**, 91–92.
